# Supplementary material
Source: PubMed Central journal article supplement (PMC6269109)
Supplement: NIHMS962119-supplement-S2.pdf [file NIHMS962119-supplement-S2.pdf]

SUPPLEMENTAL

**Supplemental Table 1: Osmotic stress, regardless of psychogenic stress, drives activation of VP positive cells in the hypothalamic supraoptic nucleus.**

| <b>Salt Loading Treatment</b> | <b>Swim Stress Treatment</b> | <b>c-Fos Positive Cell Count</b> | <b>VP Positive Cell Count</b> | <b>Double Labeled Cell Count</b> |
|-------------------------------|------------------------------|----------------------------------|-------------------------------|----------------------------------|
| <b>Tap Water</b>              | <b>No Swim</b>               | 1.3 ± 0.7<br>(n = 3)             | 28.0 ± 3.2<br>(n = 3)         | 0.0 ± 0.0<br>(n = 3)             |
| <b>Tap Water</b>              | <b>Swim</b>                  | 0.3 ± 0.3<br>(n = 4)             | 33.0 ± 2.9<br>(n = 4)         | 0.5 ± 0.5<br>(n = 4)             |
| <b>4% Saline</b>              | <b>No Swim</b>               | 55.5 ± 5.7*<br>(n = 4)           | 57.8 ± 6.3*<br>(n = 4)        | 53 ± 9.3*<br>(n = 4)             |
| <b>4% Saline</b>              | <b>Swim</b>                  | 53.2 ± 9.4*<br>(n = 3)           | 66.7 ± 10.7*<br>(n = 3)       | 50 ± 5.2*<br>(n = 3)             |
